# Supplementary material for: Expression of Transcription Factors in CD4 + T Cells as Potential Biomarkers of Motor Complications in Parkinson’s Disease
Source: PubMed Central journal article supplement — J Parkinsons Dis. 2021 Apr 13;11(2):507–14. doi: 10.3233/JPD-202417 (PMC8150526; doi:10.3233/jpd-202417), 2021-04-13
Supplement: jpd-11-jpd202417-s001.pdf [file jpd-11-jpd202417-s001.pdf]

# Supplementary Material

## Expression of Transcription Factors in CD4+ T Cells as Potential Biomarkers of Motor Complications in Parkinson's Disease

**Supplementary Table 1.** Comparison of CD4+ T lymphocytes transcription factors mRNA levels between patients with and without motor complications and healthy controls

| <b>Genes</b><br>( $2^{-\Delta Ct}$ ) | <b>PMC</b><br>(N=20)             | <b>WMC</b><br>(N=20)            | <b>HC</b><br>(N=40)             | <i>p</i><br><b>PMC vs</b><br><b>WMC</b> | <i>p</i><br><b>PD vs</b><br><b>HC</b> |
|--------------------------------------|----------------------------------|---------------------------------|---------------------------------|-----------------------------------------|---------------------------------------|
| <b>TBX21</b>                         | 3.9E-007<br>(2.7E-007-5.17E-007) | 4.1E-007<br>(3.2E-007-5.5E-007) | 2.4E-006<br>(7.3E-007-1.2E-005) | 0.465                                   | <0.001                                |
| <b>STAT1</b>                         | 1.0E-004<br>(6.4E-005-1.1E-004)  | 2.1E-004<br>(9.5E-004-2.6E-004) | 6.5E-005<br>(5.5E-005-1.5E-004) | 0.004                                   | 0.005                                 |
| <b>STAT3</b>                         | 1.3E-004<br>(9E-005-3.9E-004)    | 3.3E-004<br>(1.4E-004-3.9E-004) | 5E-004<br>(2E-004-7E-004)       | 0.304                                   | 0.001                                 |
| <b>STAT4</b>                         | 1.5E-005<br>(1.1E-005-3.4E-005)  | 1.7E-005<br>(1.3E-005-4.5E-005) | 4.7E-005<br>(1.8E-005-1.5E-004) | 0.130                                   | <0.001                                |
| <b>RORC</b>                          | 1.9E-007<br>(1.3E-007-2.7E-007)  | 2.1E-007<br>(1.4E-007-2.6E-007) | 1.6E-007<br>(9.1E-008-3E-007)   | 0.607                                   | 0.635                                 |
| <b>GATA3</b>                         | 1.1E-004<br>(6.2E-005-2E-004)    | 6.2E-005<br>(4.7E-005-1.4E-004) | 5.7E-005<br>(3.1E-005-6.8E-005) | 0.07                                    | <0.001                                |
| <b>STAT6</b>                         | 8.1E-006<br>(1.1E-006-1.2E-005)  | 9.7E-007<br>(8.8E-007-7.7E-006) | 2E-006<br>(4.7E-007-3.8E-006)   | 0.04                                    | 0.046                                 |
| <b>FOXP3</b>                         | 4.6E-005<br>(2.8E-005-1E-004)    | 5.4E-005<br>(3.5E-005-9.4E-005) | 4.5E-006<br>(1.8E-006-6E-005)   | 0.665                                   | <0.001                                |
| <b>NR4A2</b>                         | 2.9E-005<br>(2.1E-005-7.6E-005)  | 1.1E-004<br>(4.6E-005-1.2E-004) | 1.2E-004<br>(8.4E-005-1.5E-004) | 0.003                                   | <0.001                                |

CD4+ T lymphocytes transcription factors mRNA levels are expressed as  $2^{-\Delta Ct}$ . Data are shown as medians (25°-75° percentiles). Significant p values are in italics. PMC, patients with motor complications; WMC, patients without motor complications; HC, healthy controls
